# Supplementary material for: Small Ruminant Production in Tanzania, Uganda, and Ethiopia: A Systematic Review of Constraints and Potential Solutions
Source: Vet Sci. 2020 Dec 31;8(1):5. doi: 10.3390/vetsci8010005 (PMC7824089; doi:10.3390/vetsci8010005)
Supplement: Supplementary file 1 [file vetsci-08-00005-s001.xlsx]

## Sheet: Sheet1
Authors	Year published	Paper title	Journal	Country	Region	Year of study	Type of study (e.g. literature review)	Sample size	Source of outcome data (case report/survey data etc)	Factors/constraints identified	Improvements/recommendations identified.
Abebe, R; Gebreyohannes, M; Mekuria, S; Abunna, F; Regassa, A	2010	Gastrointestinal nematode infections in small ruminants under the traditional husbandry system during the dry season in southern Ethiopia	Tropical Animal Health and Production	Ethiopia	Southern Nations, Nationalities and Peoples’ Regional State	2008-2009	Original study	284 sheep, 226 goats	Examination of GI parasites, animal records.	Haemonchus and Trichostrongylus - nematode parasites.	n/a
Abraham, H; Gizaw, S; Urge, M	2018	Identification of breeding objectives for Begait goat in western Tigray, North Ethiopia	Tropical Animal Health and Production	Ethiopia	Tigray region	2016	Original study	45 goat owners	Morphometric measurements of goats, animal life history, questionnaire and focus group discussions.		n/a
Addis, SA; Desalegn, AY.	2018	Comparative Seroepidemiological Study of Brucellosis in Sheep under Smallholder Farming and Governmental Breeding Ranches of Central and North East Ethiopia	Journal of Veterinary Medicine	Ethiopia	Amhara regional state	2014-2015	Original study	Six districts, 3-5 peasant associations, max 14 sheep per flock	Sheep sera examined for the presence of Brucella antibodies, animal records.	Brucellosis	Screening of male animals for brucellosis before using for breeding. Culling breeding females with reduced reproductive performance and history of abortion.
Admassu, B; Nega, S; Haile, T; Abera, B; Hussein, A; Catley, A	2005	Impact assessment of a community-based animal health project in Dollo Ado and Dollo Bay districts, southern Ethiopia	Tropical Animal Health and Production	Ethiopia	Dollo Bay and Dollo Ado	2002	Original study	10 assessment groups	Impact scoring of diseases over time, semi-structured interviews.	Disease	Increased usage of modern veterinary drugs, biannual vaccinations by CAHWs, better availability of pasture, reduced herd mobility. Community-based animal health workers were considered to highly accessible, available, affordable and trustworthy and led to attitudinal changes among pastoralists in the use of modern medicine and the need to pay for services.
Amare, T; Goshu, G; Tamir, B.	2018	Flock composition, breeding strategies and farmers' traits of interest evaluation of Wollo highland sheep and their F 1 crosses	Journal of Animal Science and Technology	Ethiopia	South Wollo Zone of Amhara Region	Not specified	Original study	230, 370 and 675 household flocks	Multistage questionnaire survey used via semi-structured questionnaire and oral interview.	Shortage of feed, change from large flock size to small flock size for productivity and reproductive performance improvement, grazing land limitation and increasing frequency of prevailing drought.	Smallholder farm flock productivity improvement program should be designed for long-term plan using producers’ traits of interest to bring together their production objectives.
Andargachew, K; Brokken, RF	1993	Intra-annual sheep price patterns and factors underlying price variations in the central highlands of Ethiopia	Agricultural Economics	Ethiopia	185km radius of Addis	1989	Original study	9 markets, 50062 sheep	Surveys of market purchases.	Producers need for cash, quantity and quality of grazings.	n/a
Asmare, K; Megersa, B; Denbarga, Y; Abebe, G; Taye, A; Bekele, J; Bekele, T; Gelaye, E; Zewdu, E; Agonafir, A; Ayelet, G; Skjerve, E	2012	A study on seroprevalence of caprine brucellosis under three livestock production systems in southern and central Ethiopia	Tropical Animal Health and Production	Ethiopia	Oromia, SNNP region	2009-2011	Original study	10 goats on sedentary farms, 25 in agropastoral, 50 in pastoral	Surveys and serological screening.	Brucellosis	Agent isolation and biotyping of brucella strains complemented with nationwide survey.
Assenga, JA; Matemba, LE; Malakalinga, JJ; Muller, SK; Kazwala, RR	2016	Quantitative analysis of risk factors associated with brucellosis in livestock in the Katavi-Rukwa ecosystem, Tanzania	Tropical Animal Health and Production	Tanzania	Katavi region	2012-2013	Original study	138 herds of cattle and goats from 28 villages	Survey of herders and serosurvey.	Brucellosis	Improve education on disease transmission and biosecurity, proper disposal of aborted materials, animal vaccination.
Ayalew, W; King, JM; Bruns, E; Rischkowsky, B	2003	Economic evaluation of smallholder subsistence livestock production: Lessons from an Ethiopian goat development program	Ecological Economics	Ethiopia	Gursum and Kombolcha districts	1998-1999	Original study	31 improved and 37 traditional flocks	Survey of traditional households and those that showed improvement promoted by the DGDP	Disease, snake bite, plant poisoning, predator attack. Genetic improvement - poor control of the breeding. No performance or pedigree records. Small flock size clearly limit the scope for genetic selection.	Dairy Goat Development Programme (DGDP) - improved management of indigenous goats - feeding goats around homestead, better feeding practices and greater attention to basic health care, availability of attractive market for livestock and livestock products.
Ayalew, W; Rischowsky, B; King, JM; Bruns, E	2003	Crossbreds did not generate more net benefits than indigenous goats in Ethiopian smallholdings	Agricultural systems	Ethiopia	Gursum and Gorogutu Districts in Eastern Hararghe	2000-2001	Original study	210 households	Survey of households	Increased physical products in mixed flocks	Improved management.
Baars, RMT	2000	Costs and returns of camels, cattle and small ruminants in pastoral herds in eastern Ethiopia	Tropical Animal Health and Production	Ethiopia	Eastern Ethiopia.	1997-1998	Original study	1 sedentary grazing, 20 transhumant grazing and 3 nomadic	Surveys of households	Drought, diseases, predation by hyenas.	n/a
Bekele, J; Tariku, M; Abebe, R	2011	External parasite infestations in small ruminants in Wolmera district of Oromiya region, central Ethiopia	Journal of animal and veterinary advances	Ethiopia	Wolmera district	2008-2009	Original study	452 small ruminants	Ruminants examined for the presence of external parasites/lesions. Animal records and body condition scoring.	Lack of awareness, inaccessibility for control schemes, external parasites. Affects skin and hide production.	Improved education and disease control
Bekele, M; Mohammed, H; Tefera, M; Tolosa, T	2011	Small ruminant brucellosis and community perception in Jijiga District, Somali Regional State, Eastern Ethiopia	Tropical Animal Health and Production	Ethiopia	Jijiga district	2008 - 2009	Original study	64 heads of households, 730 sera samples	Survey and seroprevalence	Brucellosis. Illiterateracy.	Improve awarenesss of transmission factors, and education of farmers, proper laboratory facilities, and trained personnel to collect and test samples, record keeping and active surveillance programs.
Berhanu, W; Negussie, H; Alemu, S; Mazengia, H	2011	Assessment on major factors that cause skin rejection at Modjo export tannery, Ethiopia	Tropical Animal Health and Production	Ethiopia	Modjo town, Oromia National Regional State	2009-2010	Original study	898 pickled sheep skins and 975 wet blue goat skins	Identification of ectoparasites on pelts and identification of skin defects on sheep pickle and goats wet blue skins.	Skin defects - shoat pox, ectoparasites,	ontrol and eradication of ectoparasites by using dipping or spraying with acaricides or using other ectoparasite control strategies.
Casey-Bryars, M; Reeve, R; Bastola, U; Knowles, NJ; Auty, H; Bachanek-Bankowska, K; Fowler, VL; Fyumagwa, R; Kazwala, R; Kibona, T; King, A; King, DP; Lankester, F; Ludi, AB; Lugelo, A; Maree, FF; Mshanga, D; Ndhlovu, G; Parekh, K; Paton, DJ; Perry, B; Wadsworth, J; Parida, S; Haydon, DT; Marsh, TL; Cleaveland, S; Lembo, T.	2018	Waves of endemic foot-and-mouth disease in eastern Africa suggest feasibility of proactive vaccination approaches	Nature Ecology and Evolution	Tanzania	Northern Tanzania	2011-2014	Original study	85 livestock owning households in 40 villages	Livestock cross-sectional study to determine socioeconomic impacts of FMD at household level.	FMD outbreaks	Vaccination as the most important prevention mechanism against FMD
De Vries, J	2008	Goats for the poor: Some keys to successful promotion of goat production among the poor	Small Ruminant Research	Tanzania	Not specified	2008	Review	n/a	n/a	Access to good breeding stock, money to purchase goats, access to adequate veterinary care and extension services, access to markets for goat products and supplies, lack of an established marketing chain.	Group approach - to overcome many of the constraints farmers face. To develop rules or by-laws, training leaders, developing accounting and reporting systems, and in networking them with other group, educating farmers in goat production and animal husbandry.
Eshete, G; Marino, J; Sillero-Zubiri, C	2018	Ethiopian wolves conflict with pastoralists in small Afroalpine relicts	African Journal of Ecology	Ethiopia	North Wollo	2011-2012	Original study	140 households	Survey	Wolves and jackals - predation	Shepherding, total avoidance of grazing, sporadic grazing and guarding dogs.
Feleke, FB; Berhe, M; Gebru, G; Hoag, D	2016	Determinants of adaptation choices to climate change by sheep and goat farmers in Northern Ethiopia: the case of Southern and Central Tigray, Ethiopia	SpringerPlus	Ethiopia	Tigray Regional State	Not specified	Original study	318 households	In-depth interviews - semi-structured questionnaire	Long dry periods - deficiency of feed and water. Poor housing.	n/a
Gebre, KT; Yfter, KA; Teweldemedhn, TG; Gebremariam, T.	2019	Participatory definition of trait preferences and breeding practices of goats in Aba’ala, Afar region: as input for designing genetic improvement program	Tropical Animal Health and Production	Ethiopia	Aba’ala district	2017	Original study	Three study sites from each of the three production systems. 90 households.	Semi-structured questionnaire and interviews and own-flock ranking experiment.	Feed scarcity and limited grazing land availability. Large flock size. Long distance from where the feed supplement can be purchased. Disease - peste des petits ruminants (PPR), scab-by mouth/contagious ecthyma/ (ORF), shoat pox, coenuruses. Access to veterinary services. Limited awareness. Water availability. Inbreeding. Record keeping.	Establishing nearby veterinary services and creating owners’ animal health management awareness. Mixing of flocks to reduce inbreeding. Community-based breeding programs.
Gebremedhin, B; Shiferaw, K; Tegene, A; Hoekstra, D	2017	A triple-hurdle model of small-ruminant production and marketing in the highlands of Ethiopia: Implications for commercial transformation	International Conference on Livestock Value Chain Finance and Access to Credit	Ethiopia	Tigray, Amhara, Oromia and SNNP	2014	Original study	4618 households	Survey of households	Diseases, accidents and predators.	n/a
Gebremedhin, EZ; Agonafir, A; Tessema, TS; Tilahun, G; Medhin, G; Vitale, M; Di Marco, V	2013	Some risk factors for reproductive failures and contribution of Toxoplasma gondii infection in sheep and goats of Central Ethiopia: A cross-sectional study	Research in Veterinary Science	Ethiopia	Ambo, Ada’a Liben and Fentale districts of Oromia Regional State	2009-2010	Original study	409 flocks and 1372 animals and 199 households	Survey of households and seroprevalance	T. gondii	Improvement of husbandry practices, education of people about the role of cats in the transmission of toxoplasmosis and the danger of consumption of raw or undercooked meat. Further detailed epidemiological study.
Haile, A; Gizaw, S; Getachew, T; Mueller, JP; Amer, P; Rekik, M; Rischkowsky, B	2019	Community-based breeding programmes are a viable solution for Ethiopian small ruminant genetic improvement but require public and private investments	Journal of Animal Breeding and Genetics	Ethiopia	Not specified	Not specified	Review	n/a	n/a	Lack of clear and documented breeding and distribution strategies.	Community‐based breeding programmes - focus on indigenous stock and consider farmers’ needs, views, decisions and active participation.Strengthening the financial capacity of cooperatives - link them to better markets. Continuous technical and institutional support in data entry and processing. Centralized data management tools facilitate easy data capture, analysis and reporting.
Hassen, AS; Tesfaye, Y	2014	Sheep and goat production objectives in pastoral and agro-pastoral production systems in Chifra district of Afar, Ethiopia	Tropical Animal Health and Production	Ethiopia	Chifra district, Afar Regional State			90 households	Cross-sectional survey	Disease - sheep and goat pox, pasteurellosis , orf, peste des petits ruminantis (PPR), and contagious caprine plueropneumonia (CCPP). Shortage of veterinary experts, poor animal health service, and lack of improved management. Feed shortage, drought, and health, unavailability ofsupplementary feeds.	Continuous training and awareness creation on feeding, health, breeding management of sheep and goats. Paravet training and improved drug supply system.
Herzog, CM; de Glanville, WA; Willett, BJ; Kibona, TJ; Cattadori, IM; Kapur, V; Hudson, PJ; Buza, J; Cleaveland, S; Bjornstad, ON	2019	Pastoral production is associated with increased peste des petits ruminants seroprevalence in northern Tanzania across sheep, goats and cattle	Epidemiology and Infection	Tanzania	Arusha and Manyara Regions	2016	Original study	7576 animals from 417 households sampled. 404 household surveys were conducted.	Seroprevalance and survey.	PPRV.	Increasing veterinary service provisions - improve access to routine, preventative veterinary care including education and vaccination.
Kassahun, A; Snyman, HA; Smit, GN.	2008	Impact of rangeland degradation on the pastoral production systems, livelihoods and perceptions of the Somali pastoralists in Eastern Ethiopia	Journal of Arid Environments	Ethiopia	Shinile zone	2004-2005	Original study	Fifty elder pastoralists per village - total of 300 from all villages	Structured questionnaires and formal discussions. Secondary data also collected from national and regional reports.	Rangeland degradation, land shrinkage, recurrent droughts, increasing feed shortage, increases in water shortages, reduction of vegetation cover. Increasing animal diseases and insect problems.	Community participation-based environmental rehabilitation and conservation. Development of infrastructures and water systems, improvement of livestock development schemes and grazing management systems, enhancement of drought mitigation strategies, volunteer settlements and income generation schemes, and undertaking of integrated rangeland and livestock research packages.
Kebede, T; Haile, A; Dadi, H	2012	Smallholder goat breeding and flock management practices in the central rift valley of Ethiopia	Tropical Animal Health and Production	Ethiopia	Adami Tulu Jido-Kombolcha (ATJK) and Shalla districts	2009-2010	Original study	202 households	Purposive sampling followed by identification of potential peasant associations (PAs). Individual interview by use of semistructured questionnaire	Shortage of grazing land (feed shortage), recurrent drought, frequent selling of animals to mitigate crop failure and high prevalence of diseases. Tethering practices of goats.	n/a
Kenfo, H; Mekasha, Y; Tadesse, Y	2018	A study on sheep farming practices in relation to future production strategies in Bensa district of Southern Ethiopia	Tropical Animal Health and Production	Ethiopia	Bensa district	2015-2016	Original study	128 households	Semi-structured questionnaire, individual interview, field observations and group discussions.	Ovine pasteurellosis (Sonbe), contagious caprine pleuropneumonia (Shonbe), and sheep pox, liver fluke, pasteurollosis and external parasites. Cold environment, size of grazing land, feed shortage, disease, genotype, market, predator and labor problems	Improve grazing land - controlled grazing, introduction of improved fodder grasses and legumes, and enhancement of the nutritive value of crop residues through urea treatment.
Kocho, T; Abebe, G; Tegegne, A; Gebremedhin, B	2011	Marketing value-chain of smallholder sheep and goats in crop-livestock mixed farming system of Alaba, Southern Ethiopia	Small Ruminant Research	Ethiopia	Alaba district of SNNPR	Not specified	Original study	150 households	Informal and formal survey tools, focus group discussions and key informants interview. Expert consultation, field visits and secondary data were used for sampling the study sites and households.	Ectoparasite infestation and poor nutrition.	Improvement in infrastructure, market information and intelligence, formulation of new marketing policies and institutional reforms to ease constraints on market involvement. Value chain innovation. Formation of small farmer groups and associations to increase access to information, increase participation in formal markets and lower transaction costs.
Lie, H; Rich, KM; Kurwijila, LR; Jervell, AM	2012	Improving smallholder livelihoods through local value chain development: A case study of goat milk yogurt in Tanzania?	International Food and Agribusiness Management Review	Tanzania	Mgeta	2010-2011	Original study	107 interviews	In-depth, semi-structured, and group interviews and secondary data from previous research.	No higher education, lack of business skills, seasonality.	Goat milk yogurt cooperative formation
Mayberry, D; Ash, A; Prestwidge, D; Herrero, M	2018	Closing yield gaps in smallholder goat production systems in Ethiopia and India	Livestock Science	Ethiopia	Not specified	Not specified	Household modelling	n/a	Baseline scenarios and interventions to increase production were simulated using a smallholder household model run over a 20 year period.	Nutrition, genetics and disease.	Improving forage quality through reseeding with a legume. Improved healthcare coupled with better livestock nutrition. Feeding goats noug seed cake.
Megersa, B; Biffa, D; Abunna, F; Regassa, A; Godfroid, J; Skjerve, E	2011	Seroprevalence of brucellosis and its contribution to abortion in cattle, camel, and goat kept under pastoral management in Borana, Ethiopia	Tropical Animal Health and Production	Ethiopia	Borana	2007-2008	Original study	16 villages, 60 goats from each village (756 goats sampled)	Seroprevalance & animal records. Questionnaire survey	Brucellosis	n/a
Megersa, B; Tadesse, C; Abunna, F; Regassa, A; Mekibib, B; Debela, E	2010	Occurrence of mastitis and associated risk factors in lactating goats under pastoral management in Borana, Southern Ethiopia	Tropical Animal Health and Production	Ethiopia	Borana	2008-2009	Original study	536 lactating does sampled from 76 flocks	Clinical examination of goats, subclinical mastitis test, questionnaire.	Mastitis	Education in disease control and husbandry.
Mekuria, S; Zerihun, A; Gebre-Egziabher, B; Tibbo, M	2008	Participatory investigation of Contagious Caprine Pleuropneumonia (CCPP) in goats in the Hammer and Benna-Tsemay districts of southern Ethiopia	Tropical Animal Health and Production	Ethiopia	Hammer and Benna-Tsemay districts	2004	Original study	8 pastoral associations selected, 679 goats sampled.	Group interviews - participatory epidemiology, serology and isolation, post mortem.	Sompo (CCPP), Quatsi (mange mite), Shoko (Tick infestation), Pirtsa (diarrhoeal syndrome), Etmma (anthrax).	n/a
Molla, B	2016	The health performance of imported Boer goat (Capra hircus) and their crosses with Woito-guji goat breeds in South Omo Zone, South-Western Ethiopia	Tropical Animal Health and Production	Ethiopia	Jinka	2011-2013	Original study	50 Boer goats and their crosses	Health performance checks.	Heart water, pyogenic infection/caseous lymphadenitis, wart/orf diseases, pox, miscellaneous (traumatic damage), caseous lymphadenitis, diarrhea, heart water, and respiratory problems (pneumonia). Poor housing conditions.	Effective and efficient mechanisms for prevention and control of heart water
Molla, B; Delil, F	2014	Mapping of major diseases and devising prevention and control regimen to common diseases in cattle and shoats in Dassenech district of South Omo Zone, South-Western Ethiopia	Tropical Animal Health and Production	Ethiopia	South Omo Zone	Not specified	Original study	Not specified	Observation of clinically acute or chronic disease signs, and sera sample collection. Matrix scoring was conducted to assess the understanding and perception of community towards major livestock diseases.	“Unknown recent disease (Nairobi sheep disease?)”, respiratory disease (pneumonic pasteurellosis), brucellosis, pest des petits ruminants (PPR), septicemic pasteurellosis, contagious caprine pleuro pneumonia (CCPP), goat pox.	Disease prevention and control taking into account seasonal disease dynamicity and the livestock population. Extensive regular epidemiological survey and surveillance should be conducted on TADs with particular emphasis to areas bordering neighboring countries. Infectious agent isolation, characterization and/or serology.
Mwebe, R; Ejobi, F; Laker, CD	2011	Assessment of the Economic Viability of Goat Management Systems in Goma Sub County and Mukono Town Council in Mukono District, Uganda	Tropical Animal Health and Production	Uganda	Goma Sub County and Mukono Town Council in Mukono District	Not specified	Original study	888 goats from 129 herds - 237 in free range management system, 71 in zero grazing, 567 in tethering, and 13 in from the small zero grazing combined with tethering.	Questionnaires	Lack of pasture, lack of veterinary services, lack of hybrid goats, goat theft, conflict with neighbours, lack of market, tethering management system, lack of record keeping.	Provision of hybrid goats, improvement of veterinary services, government and donors to provide assistance to the farmers, farmers educated on how to manage and preserve pastures.
Nampanzira, DK; Kabasa, JD; Nalule, SA; Nakalembe, I; Tabuti, JRS	2015	Characterization of the goat feeding system among rural small holder farmers in the semi-arid regions of Uganda	SpringerPlus	Uganda	Buyende District	Not specified	Original study	139 households in 14 villages.	Ethnobotanical and ecological approach - questionnaire	Diseases, shortage of land, inadequate pastures, theft, lack of vet services, poorbreeds, predators, shortage of water, labour intensive, poor shelter, poor transport, no fences, lack of knowledge, lack of money, tethering.	Improve the quality of nutrition for tethered goats using supplementation.
Nziku, ZC; Kifaro, GC; Eik, LO; Steine, T; Adnoy, T	2017	Reasons for keeping dairy goats in Tanzania, and possible goals for a sustainable breeding program	Animal Production Science	Tanzania	Mvomero, Arumeru, and Babati	2013	Original study	42 households	Household survey	Small flock size, lack of performance recording and technical know-how, lack of performance recording, animal identification (ID), recording, keeping of breeding bucks, cost of hiring breeding bucks.	Training of farmers on the importance of animal ID and assurance of constant supply of ID materials at a subsidised price. Development of an effective ID and performance recording scheme should be practical, simple, and affordable and based on traits of economic importance.
Ocaido, M; Muwazi, RT; Opuda, JA	2009	Disease incidence in ranch and pastoral livestock herds around Lake Mburo National Park, in South Western Uganda	Tropical Animal Health and Production	Uganda	Around Lake Mburo National Park	Not specified	Original study	39 ranches and 89 pastoral households.	Structured questionnaire survey and longitudinal study	Wild animals, water shortage, ticks and TBDs, pastures, lack of veterinary services, helminthosis, heartwater, orf, mange, contagious caprine pleuro pneumonia (CCPP) (20%).	Strategic tick control - intensive dipping. Drought early warning systems.
Onzima, RB; Gizaw, S; Kugonza, DR; van Arendonk, JAM; Kanis, E	2018	Production system and participatory identification of breeding objective traits for indigenous goat breeds of Uganda	Small Ruminant Research	Uganda	Arua, Mubende and Kabale districts	Not specified	Original study	217 farmers	Focus group discussion (FGD) with key stakeholders (farmers, local leaders, extension agents)	Diseases - gastrointestinal nematodes Haemonchus contortus. Limited grazing areas, lack of good quality pastures, parasites and poor veterinary/extension services, theft of stock, lack of watering sources, labour, lack of veterinary drugs and limited capital for expansion. Poor housing, quality of the breeds, harsh weather conditions, predators and marketing challenges.	Farmer preferences to be included in breeding objectives.
Sertse, T; Wossene, A	2007	Effect of ectoparasites on quality of pickled skins and their impact on the tanning industries in Amhara regional state, Ethiopia	Small Ruminant Research	Ethiopia	Amhara regional state	2002-2003	Original study	3 groups of 20 sheep skins, and three groups of 20 goat skins	Examination of skins. Tannery records of the year 2002–2003 were analyzed.	D. ovis and M.ovinus, sarcoptic mange.	n/a
Seyoum, Z; Tadesse, T; Addisu, A.	2015	Ectoparasites Prevalence in Small Ruminants in and around Sekela, Amhara Regional State, Northwest Ethiopia.	Journal of Veterinary Medicine	Ethiopia	Sekela, Amhara Regional State	2013-2014	Original study	400 small ruminants visiting the vet clinic	Animals examined for the presence of lice, fleas, ticks, mange mites, and skin lesions. Animal records. Skin scrapings	Lice, ticks,ctenocephalides species, and M. ovinus.	Effective extension systems and programs to improve community awareness on management of animals, effect of ectoparasites, and practicable strategic control measures.
Sheferaw, D; Gebru, F; Asrat, M; Tesfaye, D; Debela, E	2014	Ingestion of indigestible foreign materials by free grazing ruminants in Amhara Region, Ethiopia	Tropical Animal Health and Production	Ethiopia	Amhara Region	2011-2012	Original study	320 sheep, 320 goats, and 400 cattle rumen and reticulum examined.	Examination of animals	Foreign body	n/a
Sissay, MM; Uggla, A; Waller, PJ	2008	Prevalence and seasonal incidence of larval and adult cestode infections of sheep and goats in eastern Ethiopia	Tropical Animal Health and Production	Ethiopia	Haramaya, Harar, Dire-Dawa and Jijiga	2003-2005	Original study	655 sheep. 632 goats	Questioning of animal owners and slaughterhouse personnel. Post mortem procedures and parasitological examination.	Larval cestodes - Taenia ovis (Cysticercus ovis), T. hydatigena (C. tenuicollis), and Echinococcus granulosus (hydatid cysts).	Public awareness and education programmes, revision and upgrading of meat inspection legislation and procedures, and more authoritative efforts to reduce the stray dog population.
Solomon, TB; Snyman, HA; Smit, GN	2007	Cattle-rangeland management practices and perceptions of pastoralists towards rangeland degradation in the Borana zone of southern Ethiopia	Journal of Environmental Management	Ethiopia	Borana zone	2001	Original study	20 villages, 2 households per village interviewed. Also, 128 elders from 18 villages	Surveys and group discussions	Feed shortages, inaccessibility of grazing (too far), lack of infrastructure (e.g. roads), hilly and mountainous topography, fear of wild animals and unavailability of water, recurrent drought, animal diseases, predators.	Movement of livestock is an important management strategy for drought survival. Mobility minimizes livestock pressure on natural resources as it tends to distribute the animals over a wide area, thereby reducing the concentration of animals in one particular area.
Tadesse, D; Urge, M; Animut, G; Mekasha, Y	2014	Perceptions of households on purpose of keeping, trait preference, and production constraints for selected goat types in Ethiopia	Tropical Animal Health and Production	Ethiopia	Oromya, and Jijiga zones	Not specified	Original study	53, 50, and 52 households were sampled from lowland crop-livestock (LLCL), the highland cereal-livestock (HLCL), and the pastoral/agropastoral (P/AP) systems respectively.	Semistructured questionnaires and group discussions	Lack of access to market, skin diseases (caused by lice, keds, ticks, and mange mites), disease, shortage of feed, and water scarcity, predators, lack of alternative genotype. Endoparasites, fasciolosis, pneumonia, anthrax, pasteurellosis, and other respiratory problems, coenerosis, orf, pasteurellosis, ectoparasites/lice, and eye infection.	Select indigenous breeds based on their growth rate, size and conformation, and milk yield without ignoring their appearances and adaptability traits. Control and eradication of ectoparasites. Better feeding, watering practices and health care programs.
Tadesse, E; Negesse, T; Abebe, G	2015	Sheep production and marketing system in southern Ethiopia: the case of Awassazuria district	Tropical Animal Health and Production	Ethiopia	Awassazuria district	Not specified	Original study	120 households, 40 households from each neighbourhood	Survey	Small private grazing, nutritional deficiency and toxicity, predators, mechanical injury, internal parasites, shortage of grazing land, drought, diseases and parasites, marketing problems, lack of initial credit and input, lack of extension services, lack of modern sheep production technologies.	Introduction of adaptable forage species to the area.
Tedla, M; Gebreselassie, M.	2018	Estimating the proportion of clinically diagnosed infectious and non-infectious animal diseases in Ganta Afeshum woreda, Eastern Tigray zone, Ethiopia	BMC Research Notes	Ethiopia	Tigray regional state	2013-2014	Original study	285 clinically diseased animals	Animals diagnosed based on history, clinical signs, and simple laboratory diagnostics. Unstructured questionnaire of animal owners.	Pasteurollosis, contagious ecthyma, tick infestation, mite infestation, gastro-intestinal helminthiasis, coenurosis.	n/a
Tesfahun, B; Kebede, K; Effa, K	2017	Traditional goat husbandry practice under pastoral systems in South Omo zone, southern Ethiopia	Tropical Animal Health and Production	Ethiopia	South Omo zone	Not specified	Original study	180 households (60 per district, 20 per kebele)	Pastoralist and Farmers Agricultural Office records. Questionnaire.	Access to water, disease, feed shortage, drought, genotype.	n/a
Tolera, A	1998	Production situation and some productivity and physical characters of traditionally managed sheep and goats in kochore district, Southern Ethiopia	Journal of Applied Animal Research	Ethiopia	Kochore district	1995-1996	Original study	80 heads of selected households	Formal interview and assessment of body weight and other physical features of sheep and goats	No acccess to communal grazing land, inbreeding, disease and parasite infestation, liverflukes and lungworms, diarrhoea and pneumonia, inadequate feed supply.	Supplement feed animals, improving dry season feed supply, disease and parasite control as well as selection and proportional distribution of breeding males.
Tufa, SS; Solkner, J; Meszaros, G; Haile, A; Mwacharo, J; Khayatzadeh, N; Wurzinger, M	2019	Indigenous knowledge, practices and preferences in control of gastrointestinal nematodes in Bonga and Horro sheep of Ethiopia	Small Ruminant Research	Ethiopia	Bonga and Horro	Not specified	Original study	240 households were interviewed	Questionnaire survey and participatory epidemiology methods	Coenurosis, eye problem, orf, diarrhea, bottle jaw, coughing and diarrhea, stomach and intestinal worms e.g., Haemonchus spp.	Sustainable control options for GIN of sheep
Umeta, G; Duguma, M; Hundesa, F; Muleta, M	2011	Participatory analysis of problems limiting goat production at selected districts of East Showa zone, Ethiopia	African Journal of Agricultural Research	Ethiopia	East Showa zone	Not specified	Original study	15 to 20 farmers per kebele - x 4 kebele.	Participatory Rural Appraisal (PRA) technique	Frequency of vaccination, lack of improved breeds, lack of awareness of inbreeding shortage of feeds, lack of market information, predators, long kidding interval, and lack of awareness on utilization of goat production extension packages, shortage of labor, and diseases, inaccessibility to market, diseases - PPR, CCP, sheep and goat pox, diarrhea, pasteurellosis, ectoparasite, anthrax, circling …	Breed improvement programs, improved veterinary services, fattening extension packages, improving marketing system.
Welay, GM; Tedla, DG; Teklu, GG; Weldearegay, SK; Shibeshi, MB; Kidane, HH; Gebrezgiabher, BB; Abraha, TH	2018	A preliminary survey of major diseases of ruminants and management practices in Western Tigray province, northern Ethiopia	BMC Veterinary Research	Ethiopia	Western Tigray province	Not specified	Original study	121 respondents	Face to face interview. Structured and semi-structured questionnaire.	Lack of veterinary access, lack of awareness, predators, drought, poisoning/grass toxicosis, theft, disease - lumpy skin disease (LSD), trypanasomiasis, bovine pasteurellosis, mastitis, sheep and goat pox, foot rot. Grass toxicosis, bloat and hyena bite. Parasitic diseases of ticks, lice and mange mite infestation.	Disease and parasite control and management practice strategies.
Woldemeskel, M; Mersha, G	2010	Study on caprine and ovine dermatophilosis in Wollo, Northeast Ethiopia	Tropical Animal Health and Production	Ethiopia	Wollo	Not specified	Original study	Sheep (n=1432) and goats (n=1128) from highland, midland and lowland areas	Animal inspection for skin lesions. Skin scraping.	Disease - orf lesions, ticks.	Vaccination
